# Supplementary material for: Extremely condensing triplet states of DPEPO-type hosts through constitutional isomerization for high-efficiency deep-blue thermally activated delayed fluorescence diodes
Source: Royal Society of Chemistry journal article supplement (doi:10.1039/c5sc04848f), 2016-01-01
Supplement: c5sc04848f1.pdf [file c5sc04848f1.pdf]

## Electronic Supplementary Information

# Extremely Condensing Triplet States of DPEPO-Type Hosts through Constitutional Isomerization for High-Efficiency Deep- Blue Thermally Activated Delayed Fluorescence Diodes

Jing Zhang,<sup>‡</sup> Dongxue Ding,<sup>‡</sup> Ying Wei,<sup>\*</sup> Hui Xu<sup>\*</sup>

Key Laboratory of Functional Inorganic Material Chemistry (Ministry of Education) &  
School of Chemistry and Materials, Heilongjiang University, 74 Xuefu Road, Harbin 150080,  
P. R. China

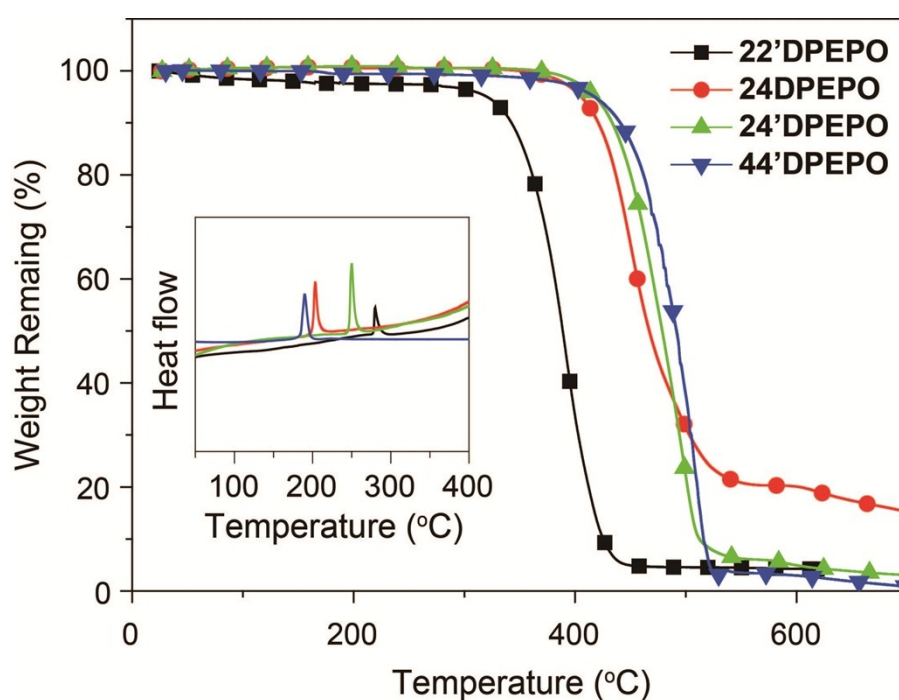

Figure S1. TGA and DSC curves of *m*DPEPO.

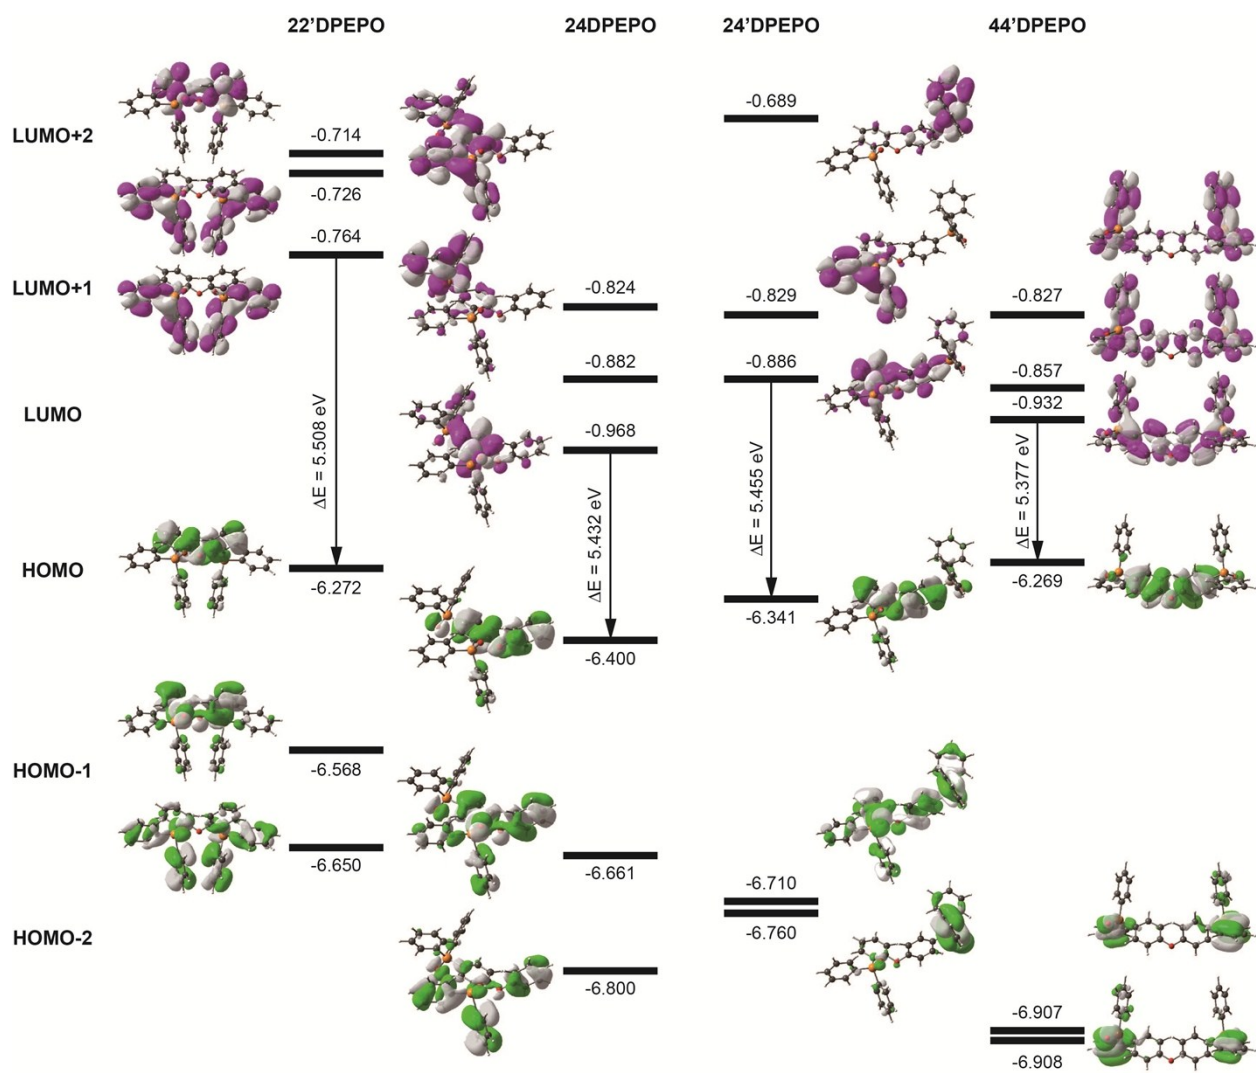

**Figure S2.** Energy levels and contours of FMOs of *m*DPEPO.

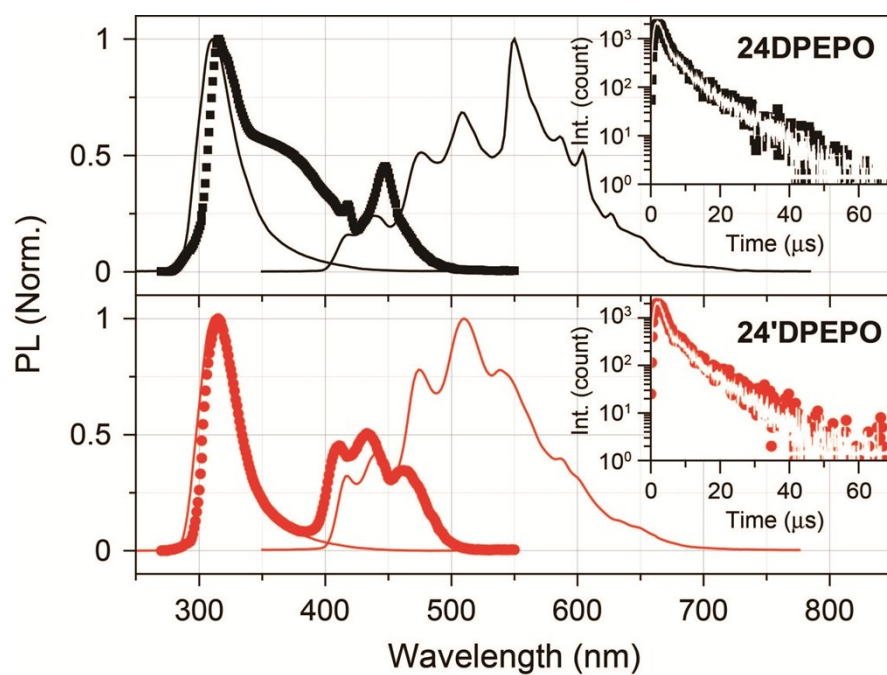

**Figure S3.** FL and PH in solution (line) and solid state emissions (symbol) of **24DPEPO** and **24'DPEPO**. Insets show the time decay curves of the 0-0 transitions from PH parts in solid state emissions (symbol) and PH spectra in solution (white line).

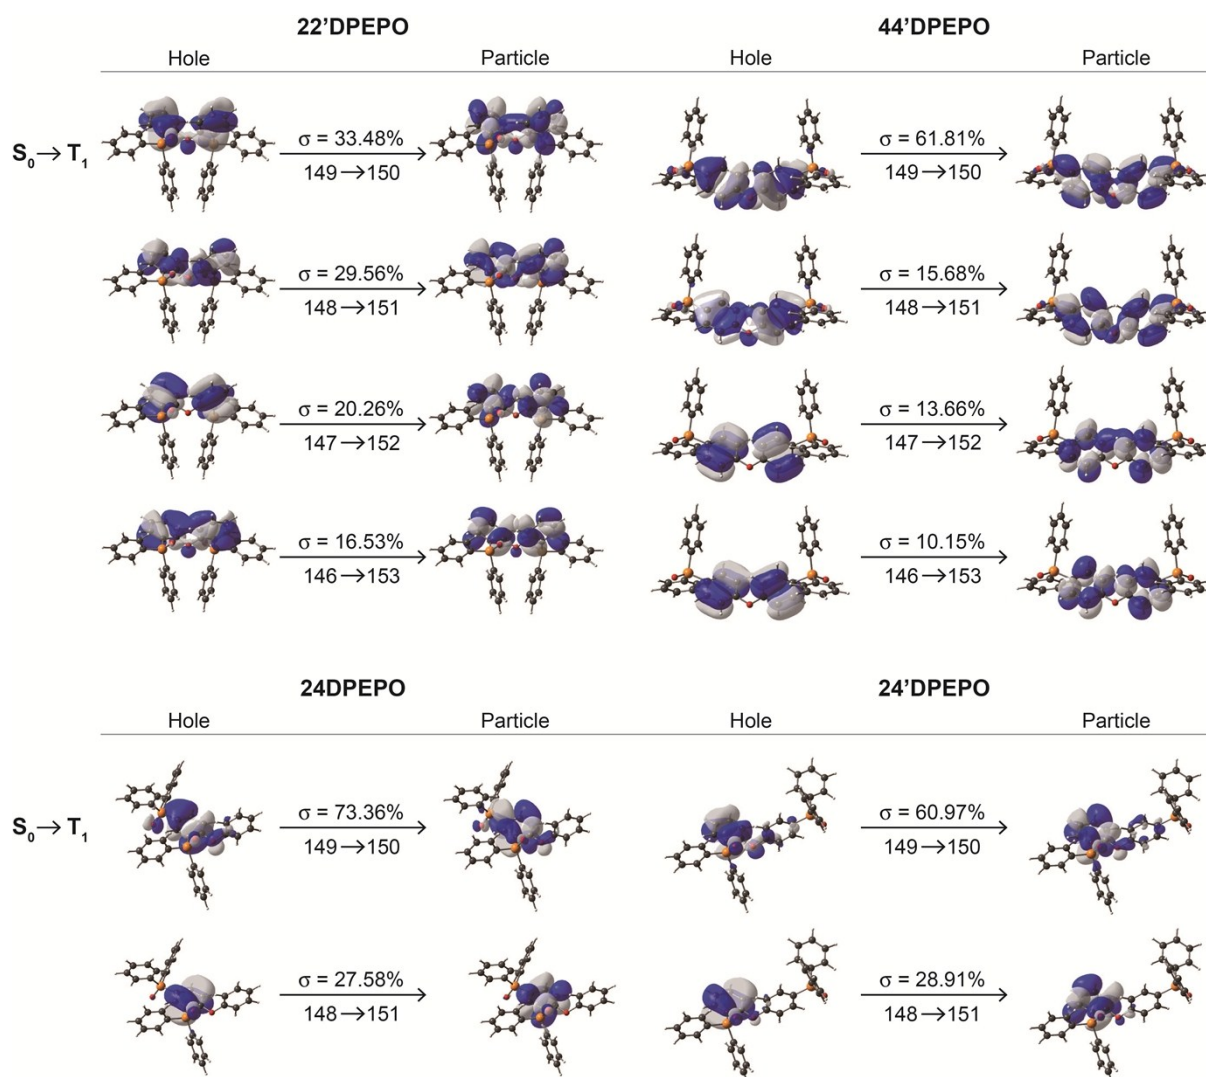

**Figure S4.** Major Natural transition orbitals (NTO) of  $S_0 \rightarrow T_1$  states for *m*DPEPO.  $\sigma$  refers to the associated weight.

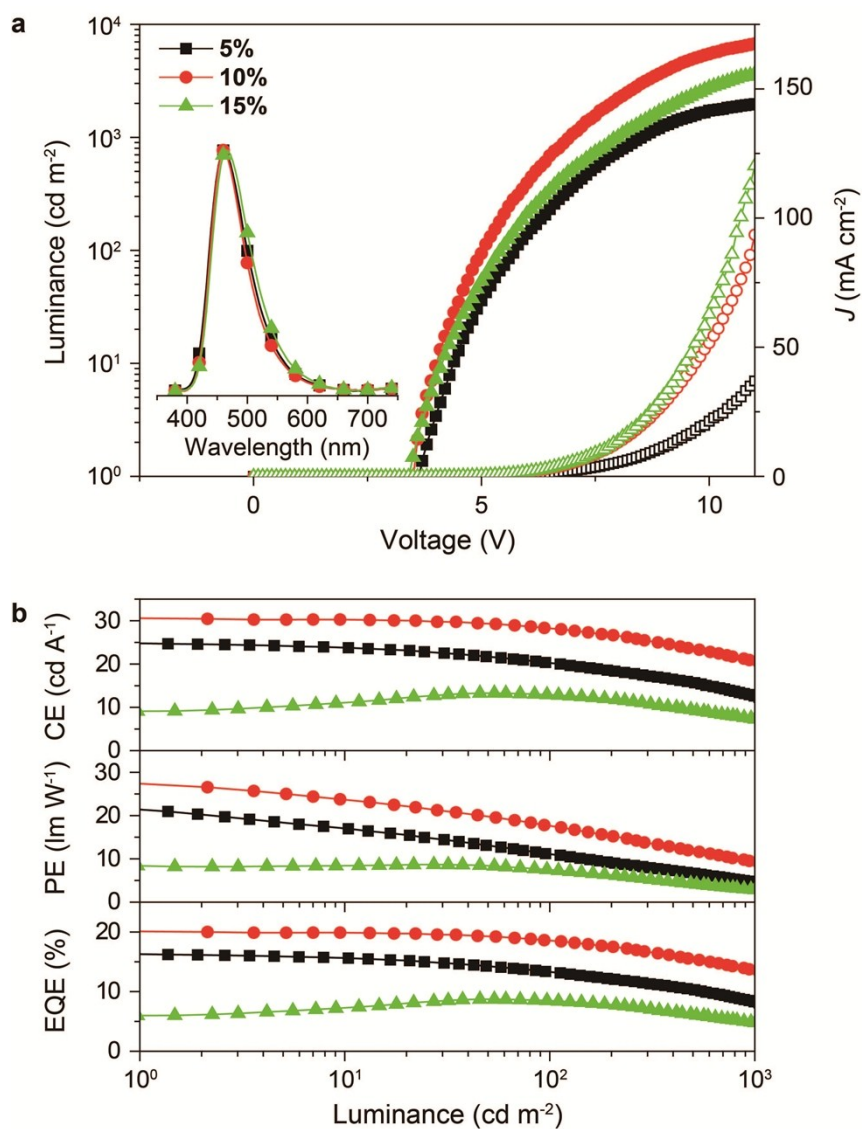

**Figure S5.** (a) Luminance- $J$ -Voltage curves and EL spectra (inset) of **24'DPEPO**-based devices with **DMAC-DPS** doping concentrations of 5, 10 and 15%, respectively; (b) Efficiency vs. Luminance curves of the devices.

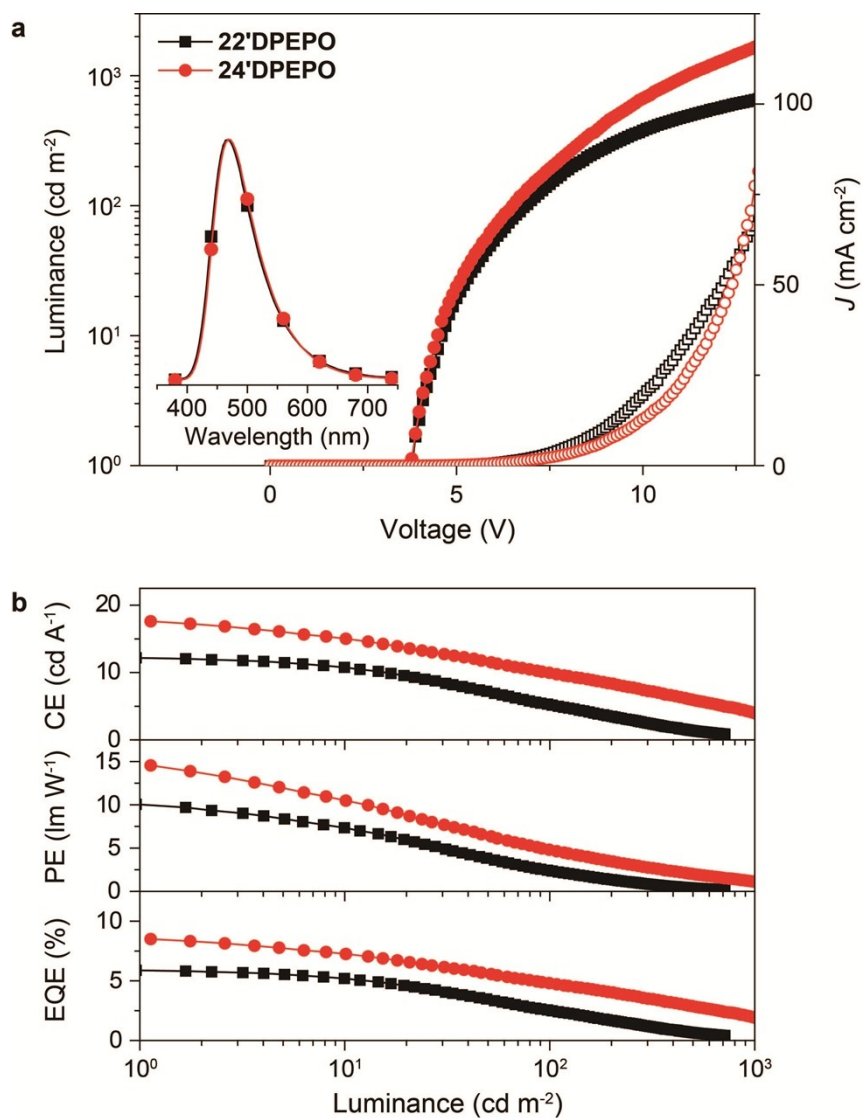

**Figure S6.** (a) Luminance- $J$ -Voltage curves and EL spectra (inset) of **2CzPN**-based devices using **22'DPEPO** and **24'DPEPO** as host, respectively; (b) Efficiency vs. Luminance curves of the devices.
